# Supplementary material for: Genome-Wide Contribution of Genotype by Environment Interaction to Variation of Diabetes-Related Traits
Source: PLoS One. 2013 Oct 28;8(10):e77442. doi: 10.1371/journal.pone.0077442 (PMC3810463; doi:10.1371/journal.pone.0077442)
Supplement: Table S6 — SNP list identified from GxE GWAS for diabetes traits in GOLDN population. (XLSX) [file pone.0077442.s009.xlsx]

## Sheet: SNP_information
Table S6 SNP list identified from GxE GWAS for diabetes traits in GOLDN population	T2D-related trait	Environmental factor	Inclusion of GxE in the model (yes or no)	Significant main effect (P ≤ 10E-5, yes or no)	Significant GxE interaction (P ≤ 10E-5, yes or no)*	P_value_SNP	P_value_interaction*	SNP	Chromosome	Position	Nearby Gene	Distance (bp)	Feature	Allele	Minor allele	Minor allele freq in GOLDN	Minor allele freq based on Europeans (dbSNP)	Minor allele freq based on CEU (Hapmap)
	HOMA-B	n-6 PUFA	Yes	Yes	Yes	1.15272e-06	1.38039e-06	rs4649444	1	231405834	PCNXL2	219329||92248	intron	A/C	A	0.205412	0.222	0.248
	HOMA-B	n-6 PUFA	Yes	Yes	Yes	7.61322e-06	9.19177e-06	rs16858849	1	231406050	PCNXL2	219545||92032	intron	A/G	G	0.190184	0.169	0.198
	HOMA-B	n-6 PUFA	Yes	Yes	Yes	6.01081e-10	2.59555e-09	rs2421332	2	61730469	LOC100132037||LOC647077	-60167||-60241	intergentic	T/C	C	0.240467	0.188	0.248
	HOMA-B	n-6 PUFA	Yes	Yes	No	9.25933e-06	0.000402689	rs10798164	1	186314719	LOC100129274||LOC100131147	-363634||-1053385	intergentic	G/T	G	0.457055	0.45	0.469
	HOMA-B	n-6 PUFA	No	Yes	NA	1.53773e-06	NA	rs10805890	5	74028637	HEXB	11870||24232	missense	A/G	G	0.160319	0.175	0.165
	HOMA-B	Protein (control)	No	Yes	NA	1.97864e-06	NA	rs10805890	5	74028637	HEXB	11870||24232	missense	A/G	G	0.160319	0.175	0.165
	HOMA-B	n-6 PUFA	Yes	Yes	No	6.12834e-06	3.8407e-05	rs11588881	1	4637243	AJAP1	22278||106468	intron	C/T	T	0.178528	0.14	0.192
	HOMA-B	Protein (control)	Yes	No	Yes	0.0114633	3.75838e-07	rs9572182	13	68984331	LOC100128625||KLHL1	-103474||-188395	intergentic	C/T	T	0.499379	0.458	0.446
	HOMA-B	n-6 PUFA	Yes	Yes	No	4.44205e-06	1.85014e-05	rs11604051	11	68985046	LOC390218||CCND1	-157197||-180008	intergentic	A/G	A	0.322086	0.358	0.312
	HOMA-B	n-6 PUFA	Yes	No	Yes	8.49679e-05	3.47002e-07	rs4441659	3	110334481	FLJ22763	654||17283	intron	A/G	A	0.122042	0.2	0.196
	HOMA-B	n-6 PUFA	Yes	Yes	No	3.60415e-06	0.000557178	rs11815387	10	36554778	LOC439954||PBEF2	-527805||-295877	intergentic	C/T	T	0.18946	0.275	0.245
	HOMA-B	n-6 PUFA	Yes	No	Yes	0.00026337	5.01513e-07	rs10049362	3	110344094	FLJ22763	10267||7670	intron	A/G	A	0.141892	0.225	0.21
	HOMA-B	Protein (control)	No	Yes	NA	7.69288e-06	NA	rs12048994	1	177801163	NPHS2	14864||10528	intron	G/T	G	0.100613	0.096	0.089
	HOMA-B	n-6 PUFA	Yes	No	Yes	0.000980656	2.62698e-06	rs4585204	3	110273777	MORC1	114001||45881	intron	C/T	T	0.137423	0.208	0.205
	HOMA-B	n-6 PUFA	Yes	No	Yes	0.000980656	2.62698e-06	rs4855687	3	110272563	MORC1	112787||47095	intron	A/G	G	0.137423	0.208	0.205
	HOMA-B	n-6 PUFA	Yes	Yes	No	2.65381e-06	0.000276257	rs12404590	1	186251040	LOC100129274||LOC100131147	-299955||-1117064	intergentic	A/C	A	0.461916	0.458	0.473
	HOMA-B	n-6 PUFA	Yes	Yes	No	9.92916e-07	0.000104253	rs13040929	20	55159138	PTMAP6||LOC728902	-449145||-5370	intergentic	C/T	T	0.0676507	0.1	0.094
	HOMA-B	n-6 PUFA	Yes	No	Yes	0.000970602	2.70481e-06	rs13086910	3	110256956	MORC1	97180||62702	intron	A/C	A	0.136531	0.208	0.205
	HOMA-B	n-6 PUFA	Yes	Yes	No	9.65308e-06	0.000459415	rs1323012	1	186304556	LOC100129274||LOC100131147	-353471||-1063548	intergentic	G/T	T	0.457669	0.406	0.469
	HOMA-B	n-6 PUFA	No	Yes	NA	3.61194e-06	NA	rs1372330	9	118559409	ASTN2	332081||657729	intron	A/G	A	0.118405	0.142	0.143
	HOMA-B	Protein (control)	No	Yes	NA	3.79937e-06	NA	rs1372330	9	118559409	ASTN2	332081||657729	intron	A/G	A	0.118405	0.142	0.143
	HOMA-B	n-6 PUFA	Yes	No	Yes	0.0028998	3.32997e-06	rs4413319	3	110273546	MORC1	113770||46112	intron	C/T	C	0.135169	0.208	0.203
	HOMA-B	n-6 PUFA	No	Yes	NA	5.04689e-06	NA	rs17793122	16	80546985	PLCG2	184217||2415	intron	A/G	A	0.352147	0.367	0.304
	HOMA-B	Protein (control)	No	Yes	NA	6.15485e-06	NA	rs17793122	16	80546985	PLCG2	184217||2415	intron	A/G	A	0.352147	0.367	0.304
	HOMA-B	n-6 PUFA	Yes	Yes	No	8.46682e-06	0.00046912	rs2073146	20	55603269	PCK1||ZBP1	-28347||-9039	intergentic	C/A	A	0.365148	0.408	0.424
	HOMA-B	n-6 PUFA	Yes	No	Yes	0.00174488	5.72463e-06	rs1016553	3	65354334	MAGI1	39388||645215	intron	G/A	A	0.057572	0.04	0.065
	HOMA-B	n-6 PUFA	Yes	No	Yes	0.000741455	6.28435e-06	rs2127521	3	65357180	MAGI1	42234||642369	intron	T/C	T	0.0553506	0.04	0.064
	HOMA-B	n-6 PUFA	Yes	No	Yes	2.58315e-05	6.83127e-06	rs6533014	4	103568763	LOC100133085||NFKB1	-16720||-72755	intergentic	A/G	A	0.478528	0.45	0.478
	HOMA-B	n-6 PUFA	No	Yes	NA	4.13231e-06	NA	rs2524051	6	31363479	HLA-C||HLA-B	-15645||-66149	intergentic	G/A	G	0.117178	0.133	0.134
	HOMA-B	Protein (control)	No	Yes	NA	4.73068e-06	NA	rs2524051	6	31363479	HLA-C||HLA-B	-15645||-66149	intergentic	G/A	G	0.117178	0.133	0.134
	HOMA-B	n-6 PUFA	No	Yes	NA	2.20644e-06	NA	rs2524118	6	31338646	HCG27||HLA-C	-58922||-5862	intergentic	T/A	A	0.11118	NA	0.134
	HOMA-B	Protein (control)	No	Yes	NA	2.55705e-06	NA	rs2524118	6	31338646	HCG27||HLA-C	-58922||-5862	intergentic	T/A	A	0.11118	NA	0.134
	HOMA-B	Protein (control)	No	Yes	NA	8.52798e-06	NA	rs2782573	6	119394413	C6orf60	71719||117644	intron	T/C	T	0.454433	0.562	0.513
	HOMA-B	n-6 PUFA	No	Yes	NA	4.13231e-06	NA	rs2844615	6	31350938	HLA-C||HLA-B	-3104||-78690	intergentic	T/C	T	0.117178	0.142	0.134
	HOMA-B	Protein (control)	No	Yes	NA	4.73068e-06	NA	rs2844615	6	31350938	HLA-C||HLA-B	-3104||-78690	intergentic	T/C	T	0.117178	0.142	0.134
	HOMA-B	n-6 PUFA	No	Yes	NA	4.13231e-06	NA	rs2853934	6	31361907	HLA-C||HLA-B	-14073||-67721	intergentic	T/A	T	0.117178	0.133	0.134
	HOMA-B	Protein (control)	No	Yes	NA	4.73068e-06	NA	rs2853934	6	31361907	HLA-C||HLA-B	-14073||-67721	intergentic	T/A	T	0.117178	0.133	0.134
	HOMA-B	n-6 PUFA	No	Yes	NA	4.13231e-06	NA	rs2853948	6	31353552	HLA-C||HLA-B	-5718||-76076	intergentic	G/C	C	0.117178	0.133	0.134
	HOMA-B	Protein (control)	No	Yes	NA	4.73068e-06	NA	rs2853948	6	31353552	HLA-C||HLA-B	-5718||-76076	intergentic	G/C	C	0.117178	0.133	0.134
	HOMA-B	n-6 PUFA	No	Yes	NA	8.24009e-06	NA	rs3172941	5	153778073	GALNT10	227585||1930	UTR3	C/T	T	0.256757	0.288	0.314
	HOMA-B	Protein (control)	No	Yes	NA	9.04881e-06	NA	rs3172941	5	153778073	GALNT10	227585||1930	UTR4	C/T	T	0.256757	0.288	0.314
	HOMA-B	n-6 PUFA	No	Yes	NA	6.45631e-06	NA	rs396038	6	31380959	HLA-C||HLA-B	-33125||-48669	intergentic	T/C	T	0.119018	0.133	0.134
	HOMA-B	Protein (control)	No	Yes	NA	7.52097e-06	NA	rs396038	6	31380959	HLA-C||HLA-B	-33125||-48669	intergentic	T/C	T	0.119018	0.133	0.134
	HOMA-B	n-6 PUFA	Yes	No	Yes	2.67903e-05	9.60144e-06	rs6533015	4	103574556	LOC100133085||NFKB1	-22513||-66962	intergentic	C/G	C	0.410934	0.387	0.388
	HOMA-B	Protein (control)	No	Yes	NA	8.63592e-06	NA	rs4297245	1	177627801	C1orf125	26063||162692	intron	A/G	G	0.214109	0.267	0.25
	HOMA-B	n-6 PUFA	Yes	No	Yes	0.000519893	3.37927e-06	rs12386622	7	131504141	PLXNA4	45510||479846	intron	A/G	A	0.161548	0.085	0.156
	HOMA-B	n-6 PUFA	Yes	No	Yes	0.000249316	3.83913e-06	rs10251791	7	131503150	PLXNA4	44519||480837	intron	C/T	C	0.156366	0.15	0.156
	HOMA-B	n-6 PUFA	No	Yes	NA	7.42959e-06	NA	rs4460123	5	74013280	ENC1||HEXB	-41007||-3487	intergentic	A/G	A	0.166253	0.175	0.161
	HOMA-B	Protein (control)	No	Yes	NA	9.80848e-06	NA	rs4460123	5	74013280	ENC1||HEXB	-41007||-3487	intergentic	A/G	A	0.166253	0.175	0.161
	HOMA-B	n-6 PUFA	Yes	Yes	Yes	1.7457e-06	3.26314e-08	rs7088969	10	119523747	EMX2||RAB11FIP2	-224704||-230672	intergentic	C/T	T	0.31227	0.261	0.259
	HOMA-B	n-6 PUFA	Yes	No	Yes	9.76009e-05	1.34845e-06	rs7129229	11	91740004	FAT3/LOC401705	15094/694||529280/60	intron	A/T	T	0.15092	0.175	0.192
	HOMA-B	n-6 PUFA	Yes	No	Yes	8.97505e-05	1.45914e-06	rs2155151	11	91708085	LOC100130038||LOC390239	-1218993||-761	intergentic	C/T	T	0.149199	0.167	0.188
	HOMA-B	n-6 PUFA	Yes	Yes	No	9.8329e-06	0.000602424	rs4650751	1	186278904	LOC100129274||LOC100131147	-327819||-1089200	intergentic	G/T	G	0.459698	0.438	0.468
	HOMA-B	n-6 PUFA	No	Yes	NA	3.67487e-06	NA	rs4737394	8	56761900	LOC100133234||TMEM68	-231536||-51974	intergentic	A/G	A	0.136196	0.108	0.125
	HOMA-B	Protein (control)	No	Yes	NA	3.15283e-06	NA	rs4737394	8	56761900	LOC100133234||TMEM68	-231536||-51974	intergentic	A/G	A	0.136196	0.108	0.125
	HOMA-B	n-6 PUFA	No	Yes	NA	3.52359e-06	NA	rs4737395	8	56762102	LOC100133234||TMEM68	-231738||-51772	intergentic	A/G	G	0.139027	0.108	0.125
	HOMA-B	Protein (control)	No	Yes	NA	2.91781e-06	NA	rs4737395	8	56762102	LOC100133234||TMEM68	-231738||-51772	intergentic	A/G	G	0.139027	0.108	0.125
	HOMA-B	n-6 PUFA	Yes	No	Yes	0.000588032	2.06648e-06	rs4554857	11	91730137	FAT3	5227||539147	intron	C/T	C	0.19816	0.247	0.259
	HOMA-B	n-6 PUFA	Yes	No	Yes	0.000149623	2.51808e-06	rs11603009	11	91711446	LOC390239||FAT3	-2136||-13464	intergentic	A/G	G	0.152469	0.188	0.192
	HOMA-B	n-6 PUFA	Yes	No	Yes	0.000128107	3.16231e-06	rs11822486	11	91756844	FAT3	31934||512440	intron	A/G	A	0.152147	0.175	0.201
	HOMA-B	n-6 PUFA	Yes	No	Yes	0.000108656	3.25379e-06	rs481643	11	91760890	FAT3	35980||508394	intron	A/G	A	0.154275	0.175	0.201
	HOMA-B	n-6 PUFA	No	Yes	NA	1.23321e-06	NA	rs6683623	1	177674031	C1orf125	72293||116462	intron	A/C	C	0.200123	0.285	0.241
	HOMA-B	Protein (control)	No	Yes	NA	9.46155e-07	NA	rs6683623	1	177674031	C1orf125	72293||116462	intron	A/C	C	0.200123	0.285	0.241
	HOMA-B	n-6 PUFA	Yes	No	Yes	0.00057668	3.43338e-06	rs11606920	11	91747169	FAT3	22259||522115	intron	C/T	C	0.197775	0.23	0.272
	HOMA-B	n-6 PUFA	Yes	No	Yes	0.000716592	4.19977e-06	rs7127751	11	91755571	FAT3	30661||513713	intron	A/G	A	0.199631	0.247	0.272
	HOMA-B	Protein (control)	Yes	No	Yes	0.00519816	8.50761e-06	rs744972	16	68099877	CYB5B||NFAT5	-42209||-56621	intergentic	A/C	C	0.255828	0.28	0.268
	HOMA-B	n-6 PUFA	Yes	No	Yes	0.00335098	4.32502e-06	rs12302103	12	12620583	LOC644467	8181||34548	intergentic	A/G	A	0.266996	0.242	0.241
	HOMA-B	n-6 PUFA	Yes	Yes	No	9.25933e-06	0.000402689	rs7523908	1	186315053	LOC100129274||LOC100131147	-363968||-1053051	intergentic	C/G	C	0.457055	0.439	0.469
	HOMA-B	n-6 PUFA	Yes	Yes	No	2.32475e-06	0.000252657	rs7544859	1	186279910	LOC100129274||LOC100131147	-328825||-1088194	intergentic	A/G	G	0.462392	0.438	0.469
	HOMA-B	n-6 PUFA	Yes	No	Yes	0.000625083	6.50345e-06	rs4074373	16	82113026	CDH13	894947||274676	intron	G/A	G	0.157669	0.14	0.134
	HOMA-IR	Carbohydrate	Yes	Yes	Yes	5.90332e-06	1.6578e-07	rs10055171	5	62130100	ISCA1L||HTR1A	-21174||-1161934	intergentic	A/C	C	0.207257	0.212	0.223
	HOMA-IR	Carbohydrate	Yes	Yes	Yes	7.56656e-06	1.7036e-07	rs10058718	5	62119870	ISCA1L||HTR1A	-10944||-1172164	intergentic	C/G	G	0.210559	0.225	0.223
	HOMA-IR	Carbohydrate	Yes	No	Yes	4.11893e-05	3.14397e-06	rs10059071	5	62167489	ISCA1L||HTR1A	-58563||-1124545	intergentic	A/G	G	0.223926	0.233	0.241
	HOMA-IR	Carbohydrate	Yes	No	Yes	1.12192e-05	1.42652e-07	rs10059856	5	62155261	ISCA1L||HTR1A	-46335||-1136773	intergentic	G/T	T	0.210947	0.22	0.223
	HOMA-IR	Carbohydrate	Yes	Yes	Yes	5.77105e-06	1.33451e-07	rs10078232	5	62130218	ISCA1L||HTR1A	-21292||-1161816	intergentic	C/T	C	0.207975	0.22	0.223
	HOMA-IR	Protein (control)	Yes	Yes	No	4.10858e-06	1.98009e-05	rs10165804	2	214284169	SPAG16	426808||699301	intron	G/T	G	0.354759	0.333	0.321
	HOMA-IR	Protein (control)	Yes	Yes	No	3.76233e-06	7.70913e-05	rs10181294	2	213824143	IKZF2||LOC100130451	-99565||-25378	intergentic	A/G	G	0.484029	0.487	0.531
	HOMA-IR	Protein (control)	Yes	No	Yes	0.000239358	7.33047e-06	rs1028137	2	214243785	SPAG16	386424||739685	intron	G/C	G	0.28589	0.36	0.277
	HOMA-IR	Carbohydrate	Yes	No	Yes	0.014539	4.55102e-06	rs10520514	4	183019539	LOC728191||LOC100128118	-31419||-44397	intergentic	T/A	A	0.414724	0.38	0.366
	HOMA-IR	Carbohydrate	Yes	Yes	Yes	2.69034e-06	9.49283e-06	rs10744625	12	3738429	EFCAB4B||PARP11	-5905||-49859	intergentic	C/T	C	0.188344	0.15	0.143
	HOMA-IR	Protein (control)	Yes	Yes	No	3.06793e-06	0.000209578	rs11103372	9	138222840	LOC100129999||LHX3	-67204||-5077	intergentic	A/G	A	0.140051	NA	0.171
	HOMA-IR	Carbohydrate	Yes	Yes	No	4.38306e-06	9.06837e-05	rs11601274	11	7990751	EIF3F||LOC100129111	-16457||-25600	intergentic	C/T	C	0.201227	0.258	0.259
	HOMA-IR	Protein (control)	Yes	No	Yes	0.000334503	7.3327e-06	rs11648468	16	12089011	SNX29/FLJ32790	35455/907||486636/2649	intron	C/T	T	0.179058	0.2	0.149
	HOMA-IR	Protein (control)	Yes	Yes	No	9.91017e-06	2.0264e-05	rs11683006	2	214191773	SPAG16	334412||791697	intron	A/C	C	0.369647	0.342	0.317
	HOMA-IR	Carbohydrate	Yes	Yes	No	3.58776e-06	0.00023849	rs12069680	1	145751567	GJA5||LOC391092	-39459||-28153	intergentic	A/G	A	0.162762	0.133	0.138
	HOMA-IR	Carbohydrate	Yes	Yes	No	8.33521e-06	0.0115444	rs12465577	2	29568716	ALK	299572||429220	intron	C/T	C	0.262893	0.233	0.237
	HOMA-IR	Carbohydrate	Yes	Yes	No	5.16787e-06	0.00018696	rs12714281	2	29545464	ALK	276320||452472	intron	C/T	T	0.110837	0.075	0.067
	HOMA-IR	Carbohydrate	Yes	No	Yes	7.39251e-05	2.01622e-06	rs12853515	13	110579061	ARHGEF7	13278||177018	intron	C/G	G	0.139877	0.208	0.179
	HOMA-IR	Carbohydrate	Yes	No	Yes	0.000231916	1.69606e-06	rs12914656	15	84461724	LOC100129082||AGBL1	-353017||-24522	intergentic	C/T	C	0.11411	0.15	0.135
	HOMA-IR	Carbohydrate	No	Yes	NA	7.48552e-06	NA	rs13113929	4	169320943	ANXA10	70661||24525	intron	G/T	T	0.404294	0.424	0.42
	HOMA-IR	Carbohydrate	Yes	Yes	No	1.64336e-06	2.66928e-05	rs13154524	5	111917971	FLJ11235||APC	-133131||-183512	intergentic	A/G	G	0.348522	0.3	0.304
	HOMA-IR	Carbohydrate	Yes	Yes	No	9.01602e-06	0.00029871	rs1379274	5	174710190	LOC645398||DRD1	-426636||-90091	intergentic	G/A	A	0.173697	0.115	0.129
	HOMA-IR	Carbohydrate	No	Yes	NA	4.85011e-06	NA	rs1404182	2	148922881	LOC641381||MBD5	-116704||-9627	intergentic	G/C	G	0.0763547	0.093	0.085
	HOMA-IR	Protein (control)	No	Yes	NA	3.06997e-06	NA	rs1404182	2	148922881	LOC641381||MBD5	-116704||-9627	intergentic	G/C	G	0.0763547	0.093	0.085
	HOMA-IR	Carbohydrate	No	Yes	NA	5.86281e-06	NA	rs1467273	2	212773870	ERBB4	825183||337727	intron	T/C	T	0.0646552	0.033	0.054
	HOMA-IR	Protein (control)	No	Yes	NA	4.818e-06	NA	rs1467273	2	212773870	ERBB4	825183||337727	intron	T/C	T	0.0646552	0.033	0.054
	HOMA-IR	Carbohydrate	Yes	Yes	Yes	1.25603e-07	1.39513e-09	rs16891077	5	62110474	ISCA1L||HTR1A	-1548||-1181560	intergentic	A/G	A	0.208744	0.213	0.223
	HOMA-IR	Carbohydrate	Yes	No	Yes	0.000113749	6.48591e-06	rs16948444	15	84457989	LOC100129082||AGBL1	-349282||-28257	intergentic	C/T	T	0.132389	0.173	0.162
	HOMA-IR	Protein (control)	Yes	No	Yes	0.0135759	7.32976e-06	rs17250963	5	14805850	ANKH	43831||119026	intron	A/G	A	0.216564	0.207	0.21
	HOMA-IR	Carbohydrate	Yes	Yes	No	9.35991e-06	0.000216048	rs1878958	17	21315172	LOC645427||LOC731688	-58419||-33261	intergentic	A/G	A	0.476846	0.5	0.473
	HOMA-IR	Carbohydrate	No	Yes	NA	4.50202e-06	NA	rs1979037	2	148927339	LOC641381||MBD5	-121162||-5169	intergentic	C/T	T	0.0748466	0.093	0.089
	HOMA-IR	Protein (control)	No	Yes	NA	2.73599e-06	NA	rs1979037	2	148927339	LOC641381||MBD5	-121162||-5169	intergentic	C/T	T	0.0748466	0.093	0.089
	HOMA-IR	Carbohydrate	Yes	Yes	No	5.29398e-06	4.44276e-05	rs2030234	11	86643039	TMEM135	216326||69181	intron	G/A	G	0.430247	0.483	0.496
	HOMA-IR	Carbohydrate	No	Yes	NA	2.36789e-06	NA	rs2248103	4	169328876	ANXA10	78594||16592	intron	A/C	A	0.388206	0.419	0.411
	HOMA-IR	Protein (control)	No	Yes	NA	5.8221e-06	NA	rs2248103	4	169328876	ANXA10	78594||16592	intron	A/C	A	0.388206	0.419	0.411
	HOMA-IR	Carbohydrate	No	Yes	NA	3.38934e-06	NA	rs2251422	4	169324223	ANXA10	73941||21245	intron	A/G	A	0.400248	0.427	0.42
	HOMA-IR	Protein (control)	No	Yes	NA	7.83493e-06	NA	rs2251422	4	169324223	ANXA10	73941||21245	intron	A/G	A	0.400248	0.427	0.42
	HOMA-IR	Carbohydrate	Yes	Yes	Yes	2.76864e-06	1.35338e-06	rs30360	5	55869276	LOC441073||MAP3K1	-32583||-277381	intergentic	T/G	G	0.292638	0.313	0.303
	HOMA-IR	Carbohydrate	Yes	No	Yes	0.00985385	7.6187e-06	rs349569	3	141724871	CLSTN2	587974||44457	intron	G/A	G	0.112883	0.086	0.089
	HOMA-IR	Protein (control)	Yes	No	Yes	0.00733213	5.13871e-06	rs4698790	4	110947009	CFI||NOLA1	-4226||-9106	intergentic	G/T	T	0.278528	NA	0.277
	HOMA-IR	Carbohydrate	Yes	Yes	Yes	2.74304e-06	2.59997e-08	rs4700021	5	62114058	ISCA1L||HTR1A	-5132||-1177976	intergentic	C/T	T	0.204294	0.207	0.219
	HOMA-IR	Carbohydrate	Yes	Yes	Yes	1.79759e-07	2.3582e-09	rs4700512	5	62112501	ISCA1L||HTR1A	-3575||-1179533	intergentic	A/T	A	0.210947	0.208	0.22
	HOMA-IR	Carbohydrate	Yes	No	Yes	3.9449e-05	6.28469e-07	rs4700517	5	62121237	ISCA1L||HTR1A	-12311||-1170797	intergentic	C/T	T	0.397909	0.38	0.442
	HOMA-IR	Carbohydrate	Yes	No	Yes	4.44811e-05	8.86953e-07	rs4700518	5	62121264	ISCA1L||HTR1A	-12338||-1170770	intergentic	A/C	C	0.396933	0.38	0.442
	HOMA-IR	Carbohydrate	Yes	No	Yes	7.24726e-05	3.54917e-06	rs4700530	5	62163044	ISCA1L||HTR1A	-54118||-1128990	intergentic	C/T	T	0.222973	0.233	0.241
	HOMA-IR	Carbohydrate	No	Yes	NA	8.06874e-06	NA	rs4965459	15	97581967	TTC23	87916||25371	intron	C/T	C	0.219632	0.15	0.207
	HOMA-IR	Protein (control)	No	Yes	NA	8.1897e-06	NA	rs4965459	15	97581967	TTC23	87916||25371	intron	C/T	C	0.219632	0.15	0.207
	HOMA-IR	Carbohydrate	No	Yes	NA	8.71592e-06	NA	rs4972365	2	148931609	LOC641381||MBD5	-125432||-899	upstream	A/G	A	0.0736386	0.095	0.089
	HOMA-IR	Protein (control)	No	Yes	NA	5.7023e-06	NA	rs4972365	2	148931609	LOC641381||MBD5	-125432||-899	upstream	A/G	A	0.0736386	0.095	0.089
	HOMA-IR	Carbohydrate	Yes	Yes	No	6.1612e-06	0.0118237	rs567193	3	106779003	ALCAM||CBLB	-569||-80796	intergentic	G/C	G	0.178528	0.2	0.196
	HOMA-IR	Protein (control)	Yes	Yes	No	9.42486e-06	0.00049298	rs627839	1	180808704	RGSL1||RNASEL	-12349||-691	downstream	G/T	T	0.5	0.48	0.473
	HOMA-IR	Protein (control)	Yes	No	Yes	0.000170794	1.49265e-06	rs6707387	2	214256782	SPAG16	399421||726688	intron	A/G	A	0.272393	0.305	0.277
	HOMA-IR	Carbohydrate	Yes	No	Yes	4.11893e-05	3.14397e-06	rs6869062	5	62161045	ISCA1L||HTR1A	-52119||-1130989	intergentic	G/T	G	0.223926	0.233	0.241
	HOMA-IR	Protein (control)	Yes	Yes	No	8.4351e-06	0.00425728	rs7004093	8	134531473	FAM10A6||ST3GAL1	-40523||-8839	intergentic	A/G	A	0.346724	0.327	0.338
	HOMA-IR	Carbohydrate	Yes	Yes	No	6.86078e-06	5.09239e-05	rs7296444	12	126121687	LOC121296||LOC100132564	-205713||-94719	intergentic	A/G	G	0.217419	0.213	0.223
	HOMA-IR	Carbohydrate	Yes	No	Yes	0.000310878	4.72544e-06	rs742731	20	18833738	C20orf79||LOC100130062	-90702||-307153	intergentic	A/G	A	0.407362	0.394	0.393
	HOMA-IR	Protein (control)	Yes	Yes	No	7.88667e-06	3.04075e-05	rs7581685	2	213847034	IKZF2||LOC100130451	-122456||-2487	intergentic	C/T	C	0.349383	0.324	0.291
	HOMA-IR	Carbohydrate	Yes	Yes	No	8.12778e-06	0.000227904	rs7699969	4	110796272	CCDC109B	95406||32049	intron	A/G	G	0.442331	0.4	0.397
	HOMA-IR	Carbohydrate	Yes	No	Yes	5.49456e-05	9.16889e-07	rs7708428	5	62129790	ISCA1L||HTR1A	-20864||-1162244	intergentic	A/G	G	0.396679	0.37	0.436
	HOMA-IR	Carbohydrate	Yes	Yes	Yes	8.47581e-06	1.1788e-07	rs7709357	5	62143934	ISCA1L||HTR1A	-35008||-1148100	intergentic	C/T	C	0.209202	0.225	0.223
	HOMA-IR	Protein (control)	Yes	No	Yes	0.000374509	4.18706e-06	rs8048589	16	12093311	SNX29	39755||482336	intron	C/T	C	0.180982	0.208	0.152
	HOMA-IR	Carbohydrate	Yes	No	Yes	8.55705e-05	2.0222e-06	rs9391988	6	3252862	SLC22A23	38171||137355	intron	A/G	A	0.353014	NA	0.281
	HOMA-IR	Carbohydrate	No	Yes	NA	6.43681e-06	NA	rs9395546	6	50032366	CRISP1||DEFB114	-90189||-3598	intergentic	A/G	G	0.369165	0.35	0.357
	HOMA-IR	Carbohydrate	Yes	No	Yes	0.000541576	9.9239e-06	rs944961	9	121612717	DBC1||MIRN147	-441157||-434360	intergentic	C/T	T	0.452761	NA	0.451
	HOMA-IR	Carbohydrate	Yes	Yes	Yes	1.79022e-07	5.10173e-06	rs9525916	13	43600869	LOC121838||SERP2	-99887||-245109	intergentic	A/T	T	0.429803	0.467	0.428
	HOMA-IR	Carbohydrate	Yes	Yes	Yes	1.16316e-06	3.62493e-08	rs9787485	10	83556666	LOC727960||NRG3	-303619||-68411	intergentic	C/T	T	0.149367	0.183	0.179
	HOMA-IR	Carbohydrate	Yes	No	Yes	0.00475084	4.36671e-06	rs9862730	3	141706484	CLSTN2	569587||62844	intron	A/G	A	0.108589	0.1	0.089
	Insulin	Carbohydrate	Yes	Yes	Yes	3.89858e-06	1.00719e-07	rs10055171	5	62130100	ISCA1L||HTR1A	-21174||-1161934	intergentic	A/C	C	0.207257	0.212	0.223
	Insulin	Carbohydrate	Yes	No	Yes	2.56813e-05	7.01744e-06	rs10058229	5	62207059	ISCA1L||HTR1A	-98133||-1084975	intergentic	A/C	C	0.217178	0.258	0.241
	Insulin	Carbohydrate	Yes	Yes	Yes	4.91428e-06	9.9705e-08	rs10058718	5	62119870	ISCA1L||HTR1A	-10944||-1172164	intergentic	C/G	G	0.210559	0.225	0.223
	Insulin	Carbohydrate	Yes	No	Yes	2.69673e-05	1.94971e-06	rs10059071	5	62167489	ISCA1L||HTR1A	-58563||-1124545	intergentic	A/G	G	0.223926	0.233	0.241
	Insulin	Carbohydrate	Yes	Yes	Yes	7.45851e-06	8.14898e-08	rs10059856	5	62155261	ISCA1L||HTR1A	-46335||-1136773	intergentic	G/T	T	0.210947	0.22	0.223
	Insulin	Carbohydrate	Yes	Yes	Yes	3.81203e-06	8.10094e-08	rs10078232	5	62130218	ISCA1L||HTR1A	-21292||-1161816	intergentic	C/T	C	0.207975	0.22	0.223
	Insulin	Protein (control)	Yes	Yes	No	3.09235e-06	1.11429e-05	rs10165804	2	214284169	SPAG16	426808||699301	intron	G/T	G	0.354759	0.333	0.321
	Insulin	Protein (control)	Yes	Yes	No	3.72681e-06	5.55503e-05	rs10181294	2	213824143	IKZF2||LOC100130451	-99565||-25378	intergentic	A/G	G	0.484029	0.487	0.531
	Insulin	Protein (control)	Yes	No	Yes	0.000151446	3.42703e-06	rs1028137	2	214243785	SPAG16	386424||739685	intron	G/C	G	0.28589	0.36	0.277
	Insulin	Carbohydrate	Yes	No	Yes	0.0137757	4.69344e-06	rs10520514	4	183019539	LOC728191||LOC100128118	-31419||-44397	intergentic	T/A	A	0.414724	0.38	0.366
	Insulin	Carbohydrate	Yes	Yes	Yes	3.64357e-06	8.45975e-06	rs10744625	12	3738429	EFCAB4B||PARP11	-5905||-49859	intergentic	C/T	C	0.188344	0.15	0.143
	Insulin	Protein (control)	Yes	Yes	No	2.8955e-06	0.000219728	rs11103372	9	138222840	LOC100129999||LHX3	-67204||-5077	intergentic	A/G	A	0.140051	NA	0.171
	Insulin	Carbohydrate	Yes	Yes	No	5.13038e-06	9.504e-05	rs11601274	11	7990751	EIF3F||LOC100129111	-16457||-25600	intergentic	C/T	C	0.201227	0.258	0.259
	Insulin	Protein (control)	Yes	No	Yes	0.000297097	7.63319e-06	rs11648468	16	12089011	SNX29/FLJ32790	35455/907||486636/2649	intron	C/T	T	0.179058	0.2	0.149
	Insulin	Protein (control)	Yes	Yes	No	6.65025e-06	1.10898e-05	rs11683006	2	214191773	SPAG16	334412||791697	intron	A/C	C	0.369647	0.342	0.317
	Insulin	Carbohydrate	Yes	Yes	No	3.40259e-06	0.000310178	rs12069680	1	145751567	GJA5||LOC391092	-39459||-28153	intergentic	A/G	A	0.162762	0.133	0.138
	Insulin	Carbohydrate	Yes	Yes	No	7.32542e-06	0.000272812	rs12714281	2	29545464	ALK	276320||452472	intron	C/T	T	0.110837	0.075	0.067
	Insulin	Carbohydrate	Yes	No	Yes	0.00013224	4.09997e-06	rs12853515	13	110579061	ARHGEF7	13278||177018	intron	C/G	G	0.139877	0.208	0.179
	Insulin	Carbohydrate	Yes	No	Yes	0.000214771	1.75008e-06	rs12914656	15	84461724	LOC100129082||AGBL1	-353017||-24522	intergentic	C/T	C	0.11411	0.15	0.135
	Insulin	Carbohydrate	No	Yes	NA	5.14855e-06	NA	rs13113929	4	169320943	ANXA10	70661||24525	intron	G/T	T	0.404294	0.424	0.42
	Insulin	Carbohydrate	Yes	Yes	No	3.37498e-06	3.41264e-05	rs13154524	5	111917971	FLJ11235||APC	-133131||-183512	intergentic	A/G	G	0.348522	0.3	0.304
	Insulin	Carbohydrate	Yes	Yes	No	8.06582e-06	0.00026636	rs1379274	5	174710190	LOC645398||DRD1	-426636||-90091	intergentic	G/A	A	0.173697	0.115	0.129
	Insulin	Carbohydrate	No	Yes	NA	7.51653e-06	NA	rs1404182	2	148922881	LOC641381||MBD5	-116704||-9627	intergentic	G/C	G	0.0763547	0.093	0.085
	Insulin	Protein (control)	No	Yes	NA	4.71549e-06	NA	rs1404182	2	148922881	LOC641381||MBD5	-116704||-9627	intergentic	G/C	G	0.0763547	0.093	0.085
	Insulin	Carbohydrate	No	Yes	NA	9.11545e-06	NA	rs1467273	2	212773870	ERBB4	825183||337727	intron	T/C	T	0.0646552	0.033	0.054
	Insulin	Protein (control)	No	Yes	NA	7.31945e-06	NA	rs1467273	2	212773870	ERBB4	825183||337727	intron	T/C	T	0.0646552	0.033	0.054
	Insulin	Carbohydrate	Yes	Yes	Yes	8.6725e-08	9.22839e-10	rs16891077	5	62110474	ISCA1L||HTR1A	-1548||-1181560	intergentic	A/G	A	0.208744	0.213	0.223
	Insulin	Carbohydrate	Yes	No	Yes	9.72462e-05	5.89444e-06	rs16948444	15	84457989	LOC100129082||AGBL1	-349282||-28257	intergentic	C/T	T	0.132389	0.173	0.162
	Insulin	Carbohydrate	No	Yes	NA	6.90265e-06	NA	rs1979037	2	148927339	LOC641381||MBD5	-121162||-5169	intergentic	C/T	T	0.0748466	0.093	0.089
	Insulin	Protein (control)	No	Yes	NA	4.14191e-06	NA	rs1979037	2	148927339	LOC641381||MBD5	-121162||-5169	intergentic	C/T	T	0.0748466	0.093	0.089
	Insulin	Protein (control)	Yes	No	Yes	2.5006e-05	6.23307e-06	rs2013922	2	214239968	SPAG16	382607||743502	intron	T/C	T	0.357055	0.373	0.335
	Insulin	Carbohydrate	Yes	Yes	No	3.70695e-06	3.86751e-05	rs2030234	11	86643039	TMEM135	216326||69181	intron	G/A	G	0.430247	0.483	0.496
	Insulin	Carbohydrate	No	Yes	NA	2.05294e-06	NA	rs2248103	4	169328876	ANXA10	78594||16592	intron	A/C	A	0.388206	0.419	0.411
	Insulin	Protein (control)	No	Yes	NA	4.9275e-06	NA	rs2248103	4	169328876	ANXA10	78594||16592	intron	A/C	A	0.388206	0.419	0.411
	Insulin	Carbohydrate	No	Yes	NA	2.38877e-06	NA	rs2251422	4	169324223	ANXA10	73941||21245	intron	A/G	A	0.400248	0.427	0.42
	Insulin	Protein (control)	No	Yes	NA	5.40728e-06	NA	rs2251422	4	169324223	ANXA10	73941||21245	intron	A/G	A	0.400248	0.427	0.42
	Insulin	Carbohydrate	Yes	No	Yes	0.000603572	6.8363e-06	rs2876503	20	18834663	C20orf79||LOC100130062	-91627||-306228	intergentic	A/G	A	0.406634	0.393	0.393
	Insulin	Carbohydrate	Yes	Yes	Yes	1.07033e-06	8.5507e-07	rs30360	5	55869276	LOC441073||MAP3K1	-32583||-277381	intergentic	T/G	G	0.292638	0.313	0.303
	Insulin	Carbohydrate	Yes	No	Yes	0.00838536	5.47168e-06	rs349569	3	141724871	CLSTN2	587974||44457	intron	G/A	G	0.112883	0.086	0.089
	Insulin	Protein (control)	Yes	No	Yes	0.00857821	9.00072e-06	rs4698790	4	110947009	CFI||NOLA1	-4226||-9106	intergentic	G/T	T	0.278528	--	0.277
	Insulin	Carbohydrate	Yes	Yes	Yes	1.67264e-06	1.52127e-08	rs4700021	5	62114058	ISCA1L||HTR1A	-5132||-1177976	intergentic	C/T	T	0.204294	0.207	0.219
	Insulin	Carbohydrate	Yes	Yes	Yes	1.27652e-07	1.60561e-09	rs4700512	5	62112501	ISCA1L||HTR1A	-3575||-1179533	intergentic	A/T	A	0.210947	0.208	0.22
	Insulin	Carbohydrate	Yes	No	Yes	2.05364e-05	3.49017e-07	rs4700517	5	62121237	ISCA1L||HTR1A	-12311||-1170797	intergentic	C/T	T	0.397909	0.38	0.442
	Insulin	Carbohydrate	Yes	No	Yes	2.33626e-05	5.01347e-07	rs4700518	5	62121264	ISCA1L||HTR1A	-12338||-1170770	intergentic	A/C	C	0.396933	0.38	0.442
	Insulin	Carbohydrate	Yes	No	Yes	4.80723e-05	2.1874e-06	rs4700530	5	62163044	ISCA1L||HTR1A	-54118||-1128990	intergentic	C/T	T	0.222973	0.233	0.241
	Insulin	Carbohydrate	No	Yes	NA	6.63318e-06	NA	rs4965459	15	97581967	TTC23	87916||25371	intron	C/T	C	0.219632	0.15	0.207
	Insulin	Protein (control)	No	Yes	NA	6.63389e-06	NA	rs4965459	15	97581967	TTC23	87916||25371	intron	C/T	C	0.219632	0.15	0.207
	Insulin	Protein (control)	No	Yes	NA	8.38577e-06	NA	rs4972365	2	148931609	LOC641381||MBD5	-125432||-899	upstream	A/G	A	0.0736386	0.095	0.089
	Insulin	Carbohydrate	Yes	Yes	No	8.29999e-06	0.0131549	rs567193	3	106779003	ALCAM||CBLB	-569||-80796	intergentic	G/C	G	0.178528	0.2	0.196
	Insulin	Protein (control)	Yes	Yes	No	8.63715e-06	0.000321169	rs627839	1	180808704	RGSL1||RNASEL	-12349||-691	downstream	G/T	T	0.5	0.48	0.473
	Insulin	Protein (control)	Yes	No	Yes	0.00010018	6.16802e-07	rs6707387	2	214256782	SPAG16	399421||726688	intron	A/G	A	0.272393	0.305	0.277
	Insulin	Carbohydrate	Yes	No	Yes	2.69673e-05	1.94971e-06	rs6869062	5	62161045	ISCA1L||HTR1A	-52119||-1130989	intergentic	G/T	G	0.223926	0.233	0.241
	Insulin	Carbohydrate	Yes	Yes	No	7.29232e-06	3.00522e-05	rs7296444	12	126121687	LOC121296||LOC100132564	-205713||-94719	intergentic	A/G	G	0.217419	0.213	0.223
	Insulin	Carbohydrate	Yes	No	Yes	0.000195291	2.4189e-06	rs742731	20	18833738	C20orf79||LOC100130062	-90702||-307153	intergentic	A/G	A	0.407362	0.394	0.393
	Insulin	Protein (control)	Yes	Yes	No	7.47292e-06	1.75354e-05	rs7581685	2	213847034	IKZF2||LOC100130451	-122456||-2487	intergentic	C/T	C	0.349383	0.324	0.291
	Insulin	Carbohydrate	Yes	Yes	No	6.97856e-06	0.000199239	rs7699969	4	110796272	CCDC109B	95406||32049	intron	A/G	G	0.442331	0.4	0.397
	Insulin	Carbohydrate	Yes	No	Yes	2.9042e-05	5.206e-07	rs7708428	5	62129790	ISCA1L||HTR1A	-20864||-1162244	intergentic	A/G	G	0.396679	0.37	0.436
	Insulin	Carbohydrate	Yes	Yes	Yes	5.69726e-06	7.25233e-08	rs7709357	5	62143934	ISCA1L||HTR1A	-35008||-1148100	intergentic	C/T	C	0.209202	0.225	0.223
	Insulin	Protein (control)	Yes	No	Yes	0.000334612	4.48252e-06	rs8048589	16	12093311	SNX29	39755||482336	intron	C/T	C	0.180982	0.208	0.152
	Insulin	Carbohydrate	Yes	No	Yes	0.00010083	2.29402e-06	rs9391988	6	3252862	SLC22A23	38171||137355	intron	A/G	A	0.353014	NA	0.281
	Insulin	Carbohydrate	No	Yes	NA	6.68255e-06	NA	rs9395546	6	50032366	CRISP1||DEFB114	-90189||-3598	intergentic	A/G	G	0.369165	0.35	0.357
	Insulin	Carbohydrate	Yes	Yes	Yes	2.93248e-07	7.0826e-06	rs9525916	13	43600869	LOC121838||SERP2	-99887||-245109	intergentic	A/T	T	0.429803	0.467	0.428
	Insulin	Carbohydrate	Yes	Yes	Yes	1.48508e-06	4.54735e-08	rs9787485	10	83556666	LOC727960||NRG3	-303619||-68411	intergentic	C/T	T	0.149367	0.183	0.179
	Insulin	Carbohydrate	Yes	No	Yes	0.00408505	3.24739e-06	rs9862730	3	141706484	CLSTN2	569587||62844	intron	A/G	A	0.108589	0.1	0.089
	*NA: not available
